# Supplementary material
Source: PubMed Central journal article supplement (PMC7502547)
Supplement: NIHMS1605261-supplement-1.pdf [file NIHMS1605261-supplement-1.pdf]

**Supplementary Information: Long-chain fatty acyl-CoA esters regulate metabolism via allosteric control of AMPK  $\beta$ 1-isoforms.** Stephen L. Pinkosky, John W. Scott et al.

**Supplementary Information Table 1. Basal activities of AMPK expressed in COS7 mammalian cells**

| AMPK complex                                     | immobilization               | basal activity<br>(nmol/min/mg lysate) $\pm$ s.e.m. | relates to |
|--------------------------------------------------|------------------------------|-----------------------------------------------------|------------|
| $\alpha$ 1 $\beta$ 1 $\gamma$ 1                  | myc IP ( $\beta$ -subunit)   | 0.1094 $\pm$ 2.1                                    | Fig. 1f    |
| $\alpha$ 1 $\beta$ 2 $\gamma$ 1                  | myc IP ( $\beta$ -subunit)   | 0.1689 $\pm$ 17.7                                   | Fig. 1h    |
| $\alpha$ 2 $\beta$ 1 $\gamma$ 1                  | myc IP ( $\beta$ -subunit)   | 0.238 $\pm$ 0.5                                     | Fig. 1f    |
| $\alpha$ 2 $\beta$ 2 $\gamma$ 1                  | myc IP ( $\beta$ -subunit)   | 0.814 $\pm$ 6.7                                     | Fig. 1h    |
| $\alpha$ 1 $\beta$ 1 $\gamma$ 1                  | myc IP ( $\beta$ -subunit)   | 0.613 $\pm$ 7.5                                     | Fig. 2a    |
| $\alpha$ 1 $\beta$ 1(N- $\Delta$ 71) $\gamma$ 1  | myc IP ( $\beta$ -subunit)   | 0.502 $\pm$ 4.0                                     | Fig. 2a    |
| $\alpha$ 1 $\beta$ 1(N- $\Delta$ 145) $\gamma$ 1 | myc IP ( $\beta$ -subunit)   | 0.327 $\pm$ 2.5                                     | Fig. 2a    |
| $\alpha$ 1 $\beta$ 1 $\gamma$ 1                  | flag IP ( $\alpha$ -subunit) | 0.1063 $\pm$ 5.9                                    | ED Fig. 2a |
| $\alpha$ 1 $\beta$ 1 $\gamma$ 1                  | GST ( $\alpha$ -subunit)     | 0.2789 $\pm$ 20.2                                   | ED Fig. 2b |
| $\alpha$ 1 $\beta$ 1 $\gamma$ 1                  | myc IP ( $\beta$ -subunit)   | 0.1433 $\pm$ 5.3                                    | ED Fig. 3a |
| $\alpha$ 1 $\beta$ 1(S108A) $\gamma$ 1           | myc IP ( $\beta$ -subunit)   | 0.724 $\pm$ 1.4                                     | ED Fig. 3a |

**Supplementary Table 2. Basal activities of AMPK expressed in *E. coli***

| AMPK complex                           | basal activity<br>(nmol/min/mg enzyme) $\pm$ s.e.m. | relates to   |
|----------------------------------------|-----------------------------------------------------|--------------|
| $\alpha$ 1 $\beta$ 1 $\gamma$ 1        | 424.0 $\pm$ 14.8                                    | Fig. 1i & 2b |
| $\alpha$ 1 $\beta$ 2 $\gamma$ 1        | 335.6 $\pm$ 9.1                                     | Fig. 1i      |
| $\alpha$ 1 $\beta$ 1(S108A) $\gamma$ 1 | 406.1 $\pm$ 24.6                                    | Fig. 2b      |

***In silico* modelling**

Our experimental data indicated that (1) palmitoyl-CoA allosterically activates AMPK forms containing the  $\beta$ 1-subunit but not those containing the  $\beta$ 2 isoform, (2) both the  $\alpha$ -catalytic (isoforms 1 or 2) and  $\beta$ 1-regulatory subunits are required for palmitoyl-CoA activation, (3)  $\beta$ 1-CBM deletion abolishes palmitoyl-CoA allosteric activation and (4) S108 data indicates the ADaM site may be involved in palmitoyl-CoA binding. Taken together, the data suggested that palmitoyl-CoA was binding to residues in both the  $\alpha$ -catalytic and  $\beta$ 1-regulatory subunits and therefore our *in silico* modeling studies focused on potential LCFA-CoA binding pockets involving residues from both subunits.

There are five active human AMPK crystal structures in the protein data bank (PDB, <http://rscb.org>; August 2018) containing  $\alpha$ 2-catalytic and  $\beta$ 1-regulatory subunits (PDB IDs: 4CFE, 4CFF, 4ZHX, 5ISO and 6B1U) <sup>1-6</sup>. The five AMPK structures also contain the  $\gamma$ 1-regulatory subunit. There were no active human AMPK structures containing both the  $\alpha$ 1- and  $\beta$ 1-subunits (existing  $\alpha$ 1 $\beta$ 1 structures all use the rat  $\alpha$ 1-subunit). The conformational plasticity of AMPK was taken into consideration, at least in part, by selecting the structures with the greatest conformational variance for the palmitoyl-CoA docking studies (*i.e.* PDB IDs: 4CFF, 5ISO and 6B1U; when aligned to 4CFF ABE chains via C $\alpha$  atoms the root-mean-square deviation = 1.1 and 0.7 for 5ISO ABE chains and 6B1U CDF chains respectively). The channel running across the interface of the AMPK  $\alpha$ 2- and  $\beta$ 1-subunits encompasses two

**Supplementary Information: Long-chain fatty acyl-CoA esters regulate metabolism via allosteric control of AMPK  $\beta$ 1-isoforms.** Stephen L. Pinkosky, John W. Scott et al.

largely hydrophobic pockets, the well described ADaM site <sup>2,6</sup> and a novel pocket located directly below the cyclodextrin binding groove in the  $\beta$ 1-CBM (Extended Data Figure 4a-c). Palmitoyl-CoA was flexibly docked into this channel, while also allowing the side-chains of the residues lining the channel to be flexible. The docked palmitoyl-CoA poses were ranked using C-Score <sup>7</sup> and the top 30 ranked poses for each AMPK structure were retained for analysis. Any palmitoyl-CoA pose not interacting with residues from both the  $\alpha$ 2- and  $\beta$ 1-subunits was discarded.

The palmitoyl-CoA poses fell into distinct conformational clusters, some clusters were common to all three AMPK structures while others were unique to a particular AMPK conformation. For the 4CFF AMPK conformation seven clusters were observed, there were five unique palmitoyl-CoA clusters for the 5ISO AMPK conformation and two unique clusters for the 6B1U AMPK conformation (Extended Data Figure 5). In every case, the fatty-acyl chain of palmitoyl-CoA was located in the hydrophobic ADaM site and the palmitate chain appears to be optimum for spanning the length of the site. The majority of the docked poses placed the palmitoyl-CoA adenine ring in various orientations within the hydrophobic pocket lying directly below the cyclodextrin binding groove in the  $\beta$ 1-CBM (Extended Data Figure 5). The pocket is formed by  $\beta$ 1-subunit residues F82, W84, T85, L93, Y125, F127, T134, D136, P137, S138, E139, N151 and I153. The polar residues (T85, T134, D136, S138, and E139) form a border around the hydrophobic residues (F82, L93, Y125, F127 and I153) in the interior of the pocket. It is also possible for the adenine ring to make  $\pi$ - $\pi$  interactions with the aromatic residues F82, W84, Y125 and F127.  $\beta$ 1-subunit residues F82-W84 form part of  $\beta$ -strand 1, including the critical ADaM site residue  $\beta$ 1-R83 <sup>6</sup>, while residues T134-E139 lie on the flexible loop between  $\beta$ -strand 5 and 6. These palmitoyl-CoA poses also have the ribose ring (in varying orientations) located near the start of the  $\alpha$ -B helix in the  $\alpha$ 2-subunit. Residues surrounding the ribose ring are R83, T85, S138 and E139 from the  $\beta$ 1-subunit and N48, R49, Q50, K51 and T87 from the  $\alpha$ 2-subunit. Although the di-phosphate moiety is largely solvent exposed it can form interactions with nearby  $\beta$ 1-subunit residues R83, T85, G86, N111 and S138 and  $\alpha$ 2-subunit residues N48, Q50 and K51. For the 5ISO AMPK structure, palmitoyl-CoA conformational clusters 2 and 5 have the adenine ring located near the C-interacting helix ( $\beta$ 1-CBM) whereas it was located near  $\beta$ -strand 6 ( $\beta$ 1-CBM) for cluster 4; the di-phosphate moiety for all three clusters is located near the start of the  $\alpha$ -B helix ( $\alpha$ 2-subunit) and the ribose ring is found in the region between the C-interacting helix and  $\beta$ -strand 6 (both in the  $\beta$ 1-CBM). Although the palmitoyl-CoA docked poses form distinct clusters, when all of the poses for the 4CFF, 5ISO and 6B1U AMPK structures are overlaid (except for those in Clusters 2, 4 and 5 for the 5ISO AMPK structure) it is clear that they all fall under a general binding mode (Extended Data Figure 5d). From the 4CFF AMPK structure docked poses, palmitoyl-CoA pose 1 of Cluster 1 was selected to illustrate in detail the putative general palmitoyl-CoA binding mode.

To understand the  $\beta$ 1-isoform selectivity we identified the non-conserved residues in close proximity (6.0 Å radius) to the general binding mode of palmitoyl-CoA. Based on a structural alignment of the  $\beta$ -subunits the non-conserved residues are:  $\beta$ 1-F82 ( $\beta$ 2-I81) and  $\beta$ 1-T85 ( $\beta$ 2-S84) in the adenine ring binding pocket;  $\beta$ 1-G86 ( $\beta$ 2-E85) in the di-phosphate moiety binding region; and  $\beta$ 1-T106 ( $\beta$ 2-I106),  $\beta$ 1-R107 ( $\beta$ 2-K107) and  $\beta$ 1-N111 ( $\beta$ 2-D111) in the ADaM site. Although located within the ADaM site,  $\beta$ 1-N111 ( $\beta$ 2-D111) is also in the di-phosphate moiety binding region. Depending upon the specific palmitoyl-CoA conformation,  $\beta$ 1-T85 ( $\beta$ 2-S84) can also interact with the ribose ring or the di-phosphate moiety. The isoform difference  $\beta$ 1-F82 and  $\beta$ 2-I81 maintains the hydrophobic character of the adenine ring binding pocket but removes the ability of the  $\beta$ 2-subunit residue to form  $\pi$ - $\pi$  interactions with the adenine ring. The side-chains of  $\beta$ 1-T85 and  $\beta$ 2-S84 are both capable of hydrogen

**Supplementary Information: Long-chain fatty acyl-CoA esters regulate metabolism via allosteric control of AMPK  $\beta$ 1-isoforms.** Stephen L. Pinkosky, John W. Scott et al.

bonding and are similar in size, while only the backbone atoms of  $\beta$ 1-T106 ( $\beta$ 2-I106) and  $\beta$ 1-R107 ( $\beta$ 2-K107) participate in the ADaM site. Residues  $\beta$ 1-F82 ( $\beta$ 2-I81),  $\beta$ 1-T85 ( $\beta$ 2-S84),  $\beta$ 1-T106 ( $\beta$ 2-I106) and  $\beta$ 1-R107 ( $\beta$ 2-K107) are therefore considered unlikely to influence  $\beta$ 1-isoform selectivity. The introduction of negatively charged residues,  $\beta$ 2-E85 ( $\beta$ 1-G86) and  $\beta$ 2-D111 ( $\beta$ 1-N111), may result in an unfavourable charge match (*i.e.* electronic repulsion) with the negatively charged di-phosphate moiety of palmitoyl-CoA. However, the loop containing  $\beta$ 2-subunit residues S84-E85-G86-G87 would need to flip downwards from the orientation observed in the crystal structure conformations (human  $\beta$ 2-subunit PDB IDs: 6B2E and 4RER) for the side-chain of  $\beta$ 2-E85 to be located near the palmitoyl-CoA di-phosphate moiety. It was also observed in the human AMPK $\alpha$ 2 $\beta$ 2 $\gamma$ 1 structure (PDB ID: 6B2E) that  $\beta$ 2-E85 is able to hydrogen bond with the  $\beta$ 2-W83 ring nitrogen and also make charge- $\pi$  interactions with the tryptophan ring. Such interactions between E85 and W83 would likely make the S84-E85-G86-G87 loop less mobile and preclude activation of  $\beta$ 2, while allowing binding. Using a similar approach, we have docked palmitoyl-CoA to AMPK $\alpha$ 1 $\beta$ 2 $\gamma$ 1 (PDB 4RER) and AMPK $\alpha$ 2 $\beta$ 2 $\gamma$ 1 (PDB 6B2E) and found it can adopt similar binding modes to those in our palmitoyl-CoA/ $\beta$ 1 models. However, we note palmitoyl-CoA is unable to hydrogen bond with the side-chain of  $\beta$ 2-D111, which we previously showed to be essential for  $\beta$ 2 activation by the synthetic compound SC4<sup>2</sup>. This may offer an alternative explanation for our observations that palmitoyl-CoA is able to bind to, but not activate,  $\beta$ 2 AMPK.

**Supplementary references**

- 1 Langendorf, C. G. *et al.* Structural basis of allosteric and synergistic activation of AMPK by furan-2-phosphonic derivative C2 binding. *Nat Commun.* **7:10912.**, 10.1038/ncomms10912. (2016).
- 2 Ngoei, K. R. W. *et al.* Structural Determinants for Small-Molecule Activation of Skeletal Muscle AMPK alpha2beta2gamma1 by the Glucose Importagog SC4. *Cell Chem Biol.* **25**, 728-737.e729. doi: 710.1016/j.chembiol.2018.1003.1008. Epub 2018 Apr 1012. (2018).
- 3 Saxena, R. *et al.* Genetic variation in GIPR influences the glucose and insulin responses to an oral glucose challenge. *Nat Genet* **42**, 142-148, doi:10.1038/ng.521 (2010).
- 4 Viollet, B. *et al.* The AMP-activated protein kinase alpha2 catalytic subunit controls whole-body insulin sensitivity. *J Clin Invest.* **111**, 91-98. (2003).
- 5 Willows, R. *et al.* Phosphorylation of AMPK by upstream kinases is required for activity in mammalian cells. *Biochem J.* **474**, 3059-3073. doi: 3010.1042/BCJ20170458. (2017).
- 6 Xiao, B. *et al.* Structural basis of AMPK regulation by small molecule activators. *Nat Commun* **4**, 3017, doi:10.1038/ncomms4017 (2013).
- 7 Clark, R. D., Strizhev, A., Leonard, J. M., Blake, J. F. & Matthew, J. B. Consensus scoring for ligand/protein interactions. *J Mol Graph Model* **20**, 281-295, doi:10.1016/s1093-3263(01)00125-5 (2002).
